# Supplementary material
Source: PubMed Central journal article supplement (PMC3155166)
Supplement: mmc1.pdf [file mmc1.pdf]

The American Journal of Human Genetics, Volume 89

Supplemental Data

## **A Mutation in a Skin-Specific Isoform of *SMARCAD1***

### **Causes Autosomal-Dominant Adermatoglyphia**

Janna Nousbeck, Bettina Burger, Dana Fuchs-Telem, Mor Pavlovsky, Shlomit Fenig, Ofer Sarig, Peter Itin, and Eli Sprecher

**Table S1.** Oligonucleotide sequences used for amplification of *SMARCD1*

| Exon                         | Sequence                                                 |
|------------------------------|----------------------------------------------------------|
| 1                            | F- CCTTAGCATGCACTCCACCT<br>R- ACGATAACAATGCCACAGCAG      |
| 2                            | F- CTGCTGTGGCATTGTATCGT<br>R- TGAGAATCCCTTCTGCCTTT       |
| 3                            | F- CCAGCCCTGGTTGATGATTA<br>R-ATGTGGCCAAGAAAGGCAG         |
| 4                            | F- CCAGCTCAGGGTTGAGATTT<br>R- TGTCTGGCATTACTTCCTTTAG     |
| 5                            | F- GGAGTGGCCTGGACATGTTA<br>R- GGTGTTTGATAAACTGTGGAGC     |
| 6                            | F- AACAAACACTGGGCCTGATA<br>R- GGACCAGATGTGCTTGATC        |
| 7                            | F- CGGATATGCAATCAGGGTCT<br>R- GGGCAGGGTTACAGATGACT       |
| 8                            | F- CACAGAAAGCATTGTAAAGCA<br>R-GCAATCCCACCCTCTGATTA       |
| 9                            | F- AAATTGTCGTTGAATTCTTCTGT<br>R- TACACAGGATAAGGCCACCC    |
| 10                           | F- TGCCAGGGTCAAAGTAACAA<br>R- TCTCTCCTACCACTAGTTGCCA     |
| 11                           | F- TGCTTGATTCTTACTGCCAGA<br>R- GGGAGGAGTGAGGAGGGTAG      |
| 12                           | F- TTGCATTCTGGGAAATCAAA<br>R- TCCGACACACACCCTTACAC       |
| 13-14                        | F- CACATAAAGCTCATCTTCTGC<br>R- CTTTCGTATCACAGTTAACAGCA   |
| 15                           | F- CACCCGTGTCTAGTGCTGTG<br>R- GAATACGTGACAGAGGCCAT       |
| 16                           | F- TCTCCTCCCTTCACCTTTCA<br>R- GGTTTCCAAACCAATCCAAA       |
| 17-19                        | F- TCTCCTCCCTTCACCTTTCA<br>R- CCATTGGGTTCCACCAATCTT      |
| 20                           | F- TCTCCTCCCTTCACCTTTCA<br>R- AAGCAAGTCAGTGTGCCAGA       |
| 21                           | F- AACTGTTTAAACCTGTCAAGGC<br>R- CATGCCTGACCATTGAAATTA    |
| 22                           | F- CCAGAGGAGAAATAACTGCAA<br>R- ATCAGTAGCCATGCTTTGCC      |
| 23                           | F- AAATGTCAGTCTCAAGTGGCTT<br>R- TCCCACATCACACATCATCC     |
| 24                           | F- GCAAACACTAGCCCTTGAAAGATG<br>R- CCCATGGTCATCATAATGTAAA |
| Short isoform<br>unique exon | F- TGAGTTTGGAGGGATTG<br>R- GGCATTCATAAACTCAAATGC         |
